# Supplementary material for: Evaluation of the Biological Effect of Non-UV-Activated Bergapten on Selected Human Tumor Cells and the Insight into the Molecular Mechanism of Its Action
Source: MDPI journal article supplement (doi:10.3390/ijms242115555), 2023-10-25
Supplement: s1 [file s1]

**Table S1. Summary of data on cell lines used in experiments**

|                           | CELL LINE                                         | HOS             | Saos-2          | HT29            | Sw620                 | RPMI8226             | U266                 |
|---------------------------|---------------------------------------------------|-----------------|-----------------|-----------------|-----------------------|----------------------|----------------------|
| Phenotypic characteristic | Tumor source                                      | primary         | primary         | primary         | metastasis lymph node | primary              | primary              |
|                           | Histology                                         | osteosarcoma    | osteosarcoma    | colon carcinoma | colon adenocarcinoma  | plasmocytoma myeloma | plasmocytoma myeloma |
|                           | Morphology                                        | epithelial-like | epithelial-like | epithelial      | epithelial            | limphoblastic        | limphoblastic        |
|                           | Growth Mode                                       | adherent        | adherent        | adherent        | adherent              | non-adherent         | non-adherent         |
|                           | Migration/<br>Invasiveness<br>( <i>in vitro</i> ) | +++             | ++              | ++              | +++                   | +                    | +                    |
| Gene mutation             | APC                                               | -               | -               | +               | +                     | -                    | -                    |
|                           | BRAF                                              | -               | -               | +               | -                     | -                    | +                    |
|                           | CDKN2A                                            | +               | -               | -               | -                     | -                    | -                    |
|                           | EGFR                                              | -               | -               | -               | -                     | +                    | -                    |
|                           | PIK3CA                                            | -               | -               | +               | -                     | -                    | -                    |
|                           | KRAS                                              | -               | -               | -               | +                     | +                    | -                    |
|                           | SMAD4                                             | -               | -               | +               | +                     | -                    | -                    |
|                           | TP53                                              | +               | +               | +               | +                     | +                    | +                    |
|                           | RB1                                               | -               | +               | -               | -                     | -                    | +                    |

Abbreviations: APC (Adenomatous polyposis coli), BRAF ( V-Raf Murine Sarcoma Viral Oncogene Homolog B ), TP53 (Tumor protein p53), RB1 (Retinoblastoma1/RB transcriptional corepressor 1), CDKN2A (Cyclin-dependent kinase inhibitor 2A)/tumor suppressor gene.

#### References:

64. Lauvrak, S.U.; Munthe, E.; Kresse, S.H.; Stratford, E.W.; Namløs, H.M.; Meza-Zepeda, L.A.; Myklebost, O. Functional characterization of osteosarcoma cell lines and identification of mRNAs and miRNAs associated with aggressive cancer phenotypes. *Br. J. Cancer*. **2013**, *109*(8), 2228-2236. doi: 10.1038/bjc.2013.549
65. Zhu, X.L.; Liang, L.; Ding, Y.Q. [Expression of FMNL2 and its relation to the metastatic potential of human colorectal cancer cells]. *Nan Fang Yi Ke Da Xue Xue Bao*. 2008 *28*(10), 1775-1778. Chinese. PMID: 18971169.
66. Jiang, S.; Zhou, F.; Zhang, Y.; Zhou, W.; Zhu, L.; Zhang, M.; Luo, J.; Ma, R.; Xu, X.; Zhu, J.; Dong, X.; Zhang, S.; Fang, J.; Sun, J.; Yang, X. Identification of tumorigenicity-associated genes in osteosarcoma cell lines based on bioinformatic analysis and experimental validation. *J. Cancer*. **2020**, *11*(12), 3623-3633. doi: 10.7150/jca.37393
67. <https://cancer.sanger.ac.uk/cosmic>; Catalogue of Somatic Mutations in Cancer (assec on; 17 October 2023)
68. <https://maayanlab.cloud/Harmonizome/dataset/COSMIC+Cell+Line+Gene+Mutation+Profiles> COSMIC Cell Line Gene Mutation Profiles (acces on; 17 October 2023.)
